# Supplementary material for: Aurintricarboxylic Acid Decreases RNA Toxicity in a C. elegans Model of Repeat Expansions
Source: MDPI journal article supplement (doi:10.3390/toxins13120910), 2021-12-20
Supplement: s1 [file s1]

# Supplementary Materials: Aurintricarboxylic Acid Decreases RNA Toxicity in a *C. elegans* Model of Repeat Expansions

Maya Braun, Shachar Shoshani, Anna Mellul-Shtern, and Yuval Tabach

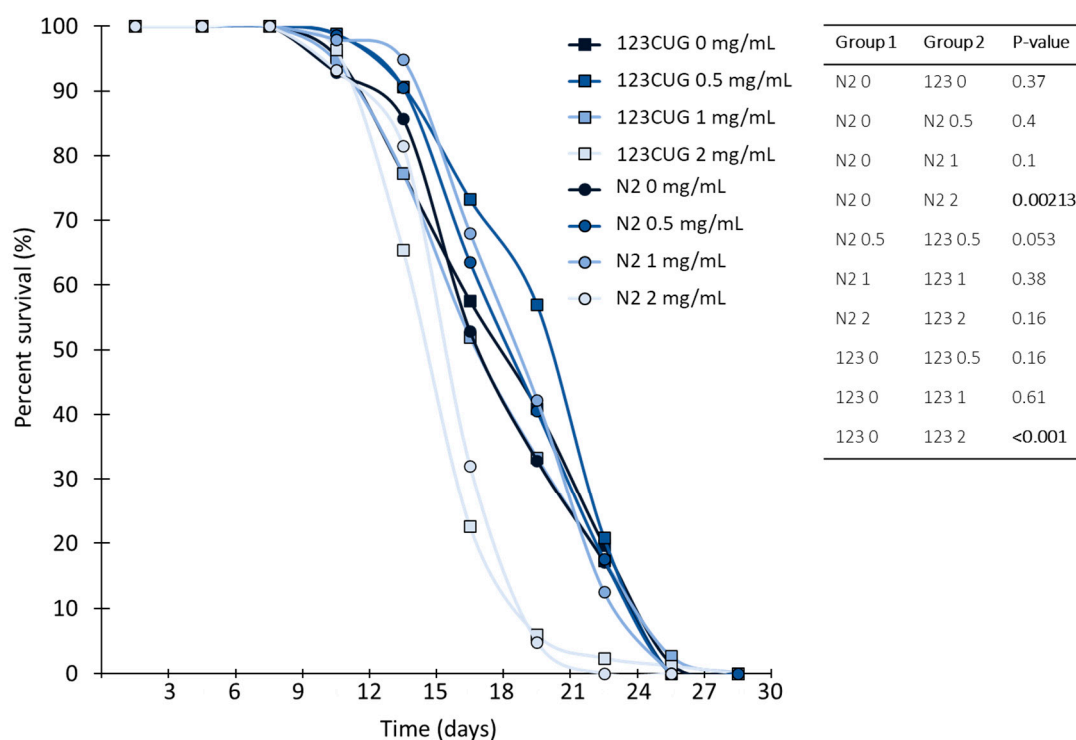

**Figure S1.** Lifespan of N2 and 123CUG following treatment with increasing doses of ATA.

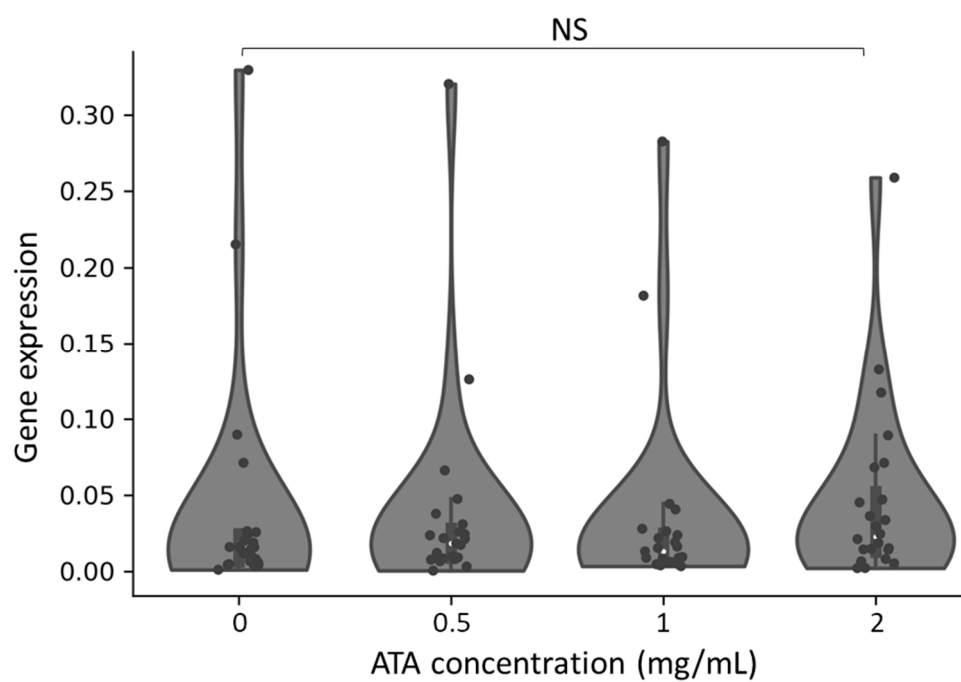

**Figure S2.** Gene expression of CTG-bearing genes in N2 nematodes following treatment with increasing doses of ATA. The qPCR is an average of three biological experiments and three technical replicates.

**Table S1.** Primer sequences for RT-qPCR.

| Gene             |                |                                 |
|------------------|----------------|---------------------------------|
| <b>ast-1</b>     | Forward Primer | 5'-AGTGGCTCGAAAATGGGGAG-3'      |
|                  | Reverse Primer | 5'-AGCCTGTGCGATTCTTGAA-3'       |
| <b>rga-4</b>     | Forward Primer | 5'-ACACTCTTGGAGAGGTATGCT-3'     |
|                  | Reverse Primer | 5'-TTCCTTGCGGAAAATCCCGT-3'      |
| <b>Y75B8A.8</b>  | Forward Primer | 5'-AACATTCCCACAGGACTCGG-3'      |
|                  | Reverse Primer | 5'-GAAGATTGCTCTGGGGACGA-3'      |
| <b>ssl-1</b>     | Forward Primer | 5'-AGCCAGGATGCGAAGATTGA-3'      |
|                  | Reverse Primer | 5'-GTTGATTTTGAGCCGTTTCG-3'      |
| <b>R08C7.11</b>  | Forward Primer | 5'-ATGGTCGGAGGGTGTCTTCT-3'      |
|                  | Reverse Primer | 5'-GTCTGCGTCGTGTACTCCTT-3'      |
| <b>Y23H5A.8</b>  | Forward Primer | 5'-TCGTGTGGAACGACCATCTG-3'      |
|                  | Reverse Primer | 5'-ATCCTGGTCCCTTGGTCCAT-3'      |
| <b>mex-1</b>     | Forward Primer | 5'-AAAACCAGAGAACATTTCGACC-3'    |
|                  | Reverse Primer | 5'-CGACGAGCAGTGTATCCTCC-3'      |
| <b>pqn-41</b>    | Forward Primer | 5'-CGCATACCAGTGACACCGAA-3'      |
|                  | Reverse Primer | 5'-CGGAATTCTCATCCCTCCG-3'       |
| <b>pqn-65</b>    | Forward Primer | 5'-CGACGAATCGGCTGAAGTACA-3'     |
|                  | Reverse Primer | 5'-GTCCTGCGACTGCTCCTAAG-3'      |
| <b>Y105E8A.2</b> | Forward Primer | 5'-GACTTATCAGGTTTGCCACGG-3'     |
|                  | Reverse Primer | 5'-CATTTTCGATTTCGGCGGGTC-3'     |
| <b>daf-2</b>     | Forward Primer | 5'-AATGCCGAGAGACACGATGC-3'      |
|                  | Reverse Primer | 5'-GGCTTCTTTCCACCGAGAGT-3'      |
| <b>Y53G8AR.9</b> | Forward Primer | 5'-TTTATCATCCGTCCGAGGCG-3'      |
|                  | Reverse Primer | 5'-CTGGCACCTTCGATTCTGAT-3'      |
| <b>Y92H12A.5</b> | Forward Primer | 5'-TCTGTTTCGAACGGGCTCTC-3'      |
|                  | Reverse Primer | 5'-GGCGTTCTCATTACCCCAA-3'       |
| <b>F09C8.2</b>   | Forward Primer | 5'-AATCTGAAACCGGAGCAGCA-3'      |
|                  | Reverse Primer | 5'-AGTTTGGTGTGAGCAGAGGAG-3'     |
| <b>Y61A9LA.3</b> | Forward Primer | 5'-GCTCTGGAGACTGGCTACAA-3'      |
|                  | Reverse Primer | 5'-CTTTGATCTCCTGGTCCCGC-3'      |
| <b>C41D11.3</b>  | Forward Primer | 5'-TGGACAAGGCAGTTCGTTGG-3'      |
|                  | Reverse Primer | 5'-GTGTTGAGCAGCACTTCTCG-3'      |
| <b>K10D6.4</b>   | Forward Primer | 5'-TTCACCGAATGCACACCGTA-3'      |
|                  | Reverse Primer | 5'-CTTCCGTGGGACACACAAGA-3'      |
| <b>scm-1</b>     | Forward Primer | 5'-ACCAACCACTCATCAGTCAAC-3'     |
|                  | Reverse Primer | 5'-ACCTGCTGCACTTCTCTGTC-3'      |
| <b>M01E5.3</b>   | Forward Primer | 5'-TATGTATGCTGCTGGGCTGG-3'      |
|                  | Reverse Primer | 5'-ATTCACGGACGTGCACAATG-3'      |
| <b>tra-1</b>     | Forward Primer | 5'-GCCCAACAAGTGTGAGTATCC-3'     |
|                  | Reverse Primer | 5'-TTCTCCGGTGGGTTTTTCAGG-3'     |
| <b>sfa-1</b>     | Forward Primer | 5'-ATTGCTGAAGCCACTGCTCT-3'      |
|                  | Reverse Primer | 5'-GAGCTCCGTTTGCCAAATCC-3'      |
| <b>pde-6</b>     | Forward Primer | 5'-ATCGCAAATCGCCAAAGACG-3'      |
|                  | Reverse Primer | 5'-ACGCGTATTCCACGTCACAT-3'      |
| <b>Y54G2A.3</b>  | Forward Primer | 5'-AAAAACCAGCGGATGAGGTGA-3'     |
|                  | Reverse Primer | 5'-TTTGAGAGCTTCTAGTTTGTACGGA-3' |

|                 |                |                                |
|-----------------|----------------|--------------------------------|
| <b>Y56A3A.6</b> | Forward Primer | 5'-TGTTATGCCACCGCGAAAAG-3'     |
|                 | Reverse Primer | 5'-GAGGTGGCTGATGGTGGAAA-3'     |
| <b>cdc-42</b>   | Forward Primer | 5'-CTGCTGGACAGGAAGATTACG-3'    |
|                 | Reverse Primer | 5'-CTCGGACATTCTCGAATGAAG-3'    |
| <b>rpl-32</b>   | Forward Primer | 5'-AGGGAATTGATAACCGTGTCCGCA-3' |
|                 | Reverse Primer | 5'-TGTAGGACTGCATGAGGAGCATGT-3' |
